# Supplementary material
Source: PubMed Central journal article supplement (PMC6885736)

## Expanded View Figures

**Figure EV1. Pathogen-induced lignification depends on CASPL1D1 and CASPL4D1.**

- A Quantification of lignin content in CA-pretreated wild-type and *caspl* leaves after *Pst* DC3000 (*AurRpm1*) inoculation. Data are shown as means  $\pm$  SD ( $n = 4$ ; 3–9 leaves each). Different letters indicate significant differences (Tukey's HSD test;  $P < 0.05$ ).
- B Quantification of leaves ( $n \geq 30$ ) with spreading cell death after *Pst* DC3000 (*AurRpm1*) inoculation.
- C Cell death phenotypes of leaves inoculated with *Pst* DC3000 (*AurRpm1*).
- D Colonization patterns of GFP-*Pst* DC3000 (*AurRpt2*). Bacterial inoculum was at  $10^8$  cfu/ml. IS, infected site; UIS, uninfected site. White dash lines indicate the boundary between IS and UIS. Scale bars, 100  $\mu$ m.

Data information: M, mock; CA, coniferyl alcohol; dpi, days post-inoculation.

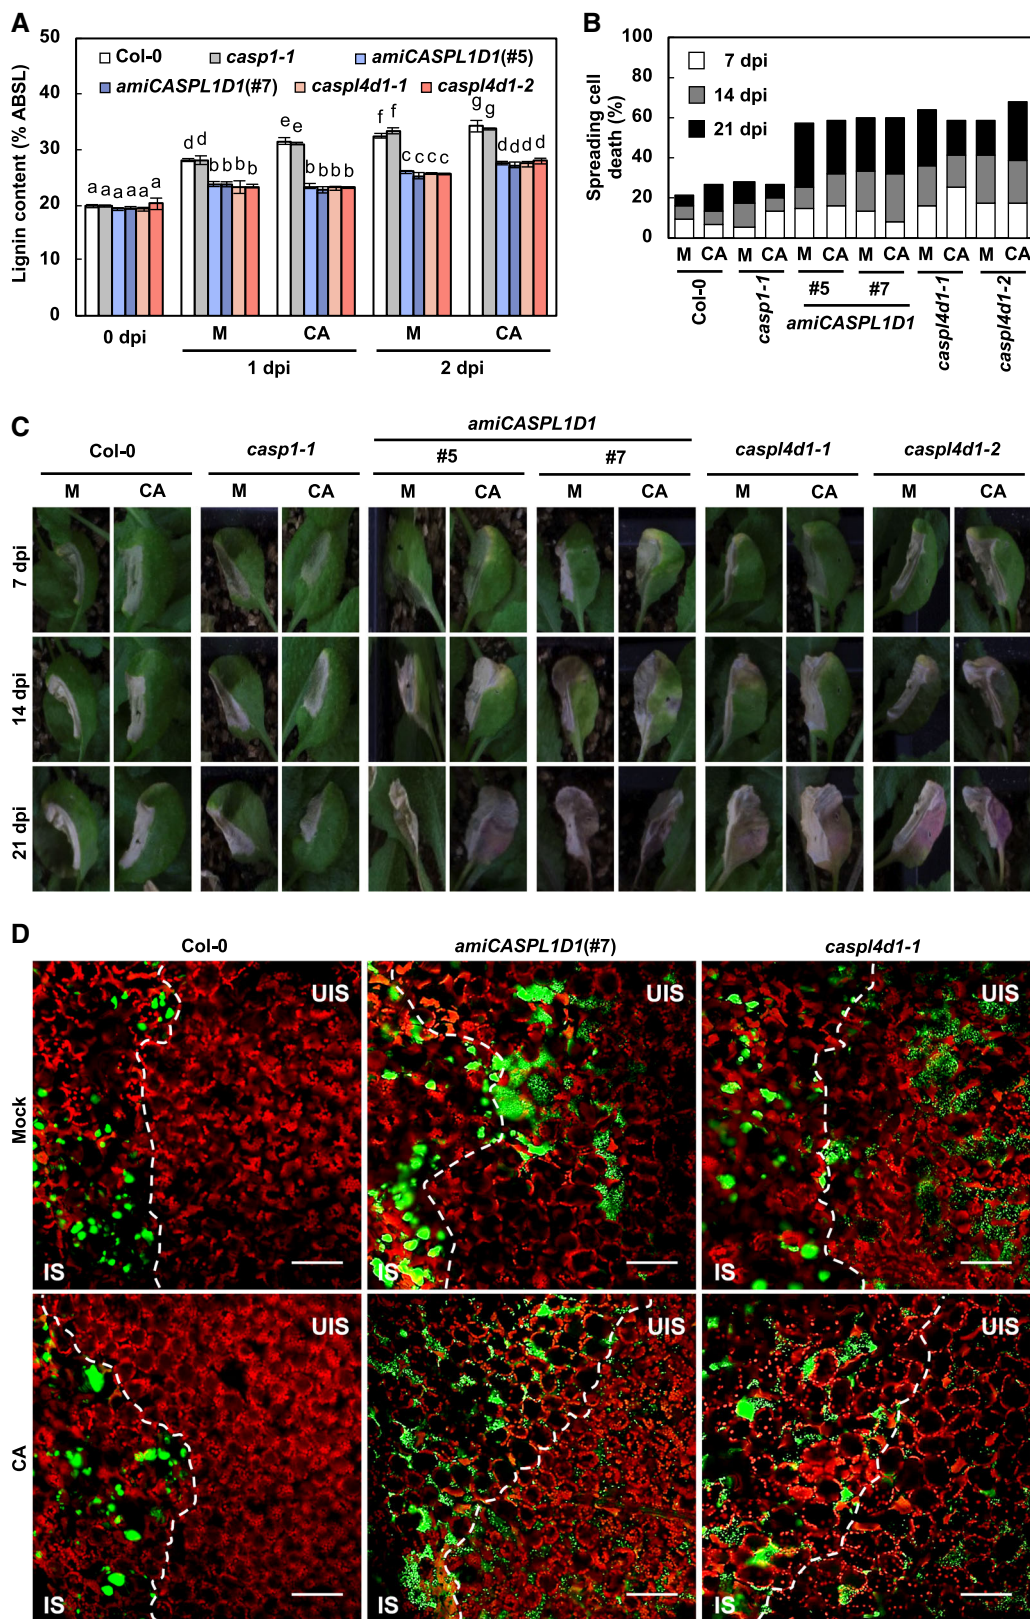

Figure EV1.

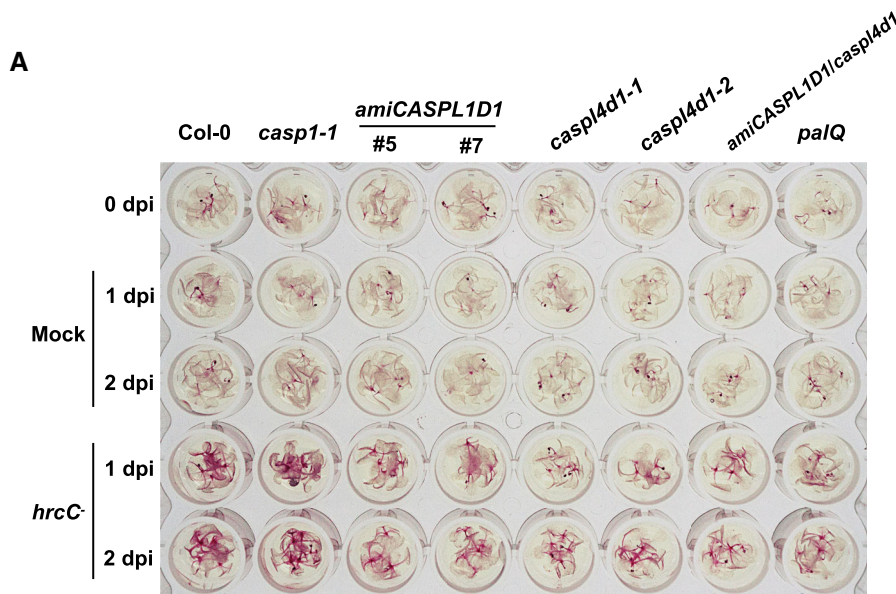

**Figure EV2. CASPLs are implicated in basal immunity.**

A Phloroglucinol staining of wild-type, *casp1*, and *palQ* seedlings flood-inoculated with *Pst* DC3000 *hrcC*<sup>-</sup> at 10<sup>8</sup> cfu/ml.

B, C Measurements of *Pst* DC3000 growth in wild-type, *casp1*, and *palQ* plants syringe-inoculated at 10<sup>5</sup> cfu/ml (B) and spray-inoculated at 10<sup>5</sup> cfu/ml (C). Data are shown as means ± SD (*n* = 3). Asterisks indicate significant differences from the respective Col-0 (t-test; \**P* < 0.05; \*\**P* < 0.01; \*\*\**P* < 0.001).

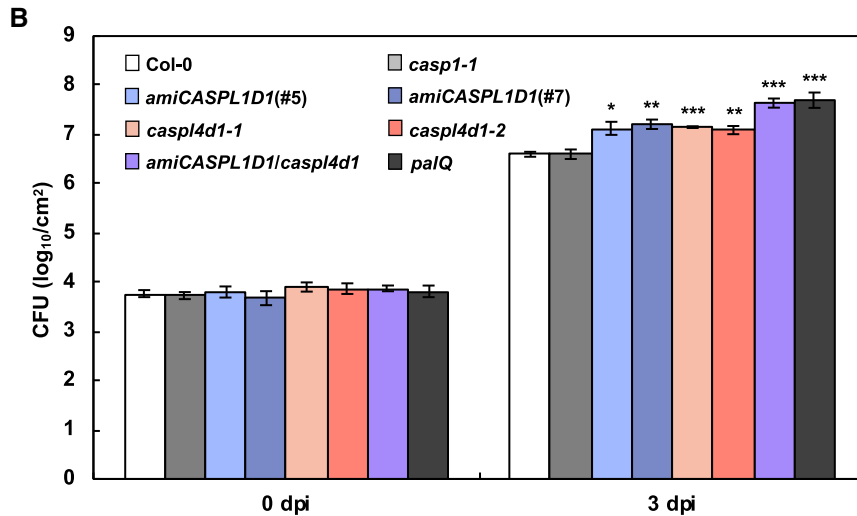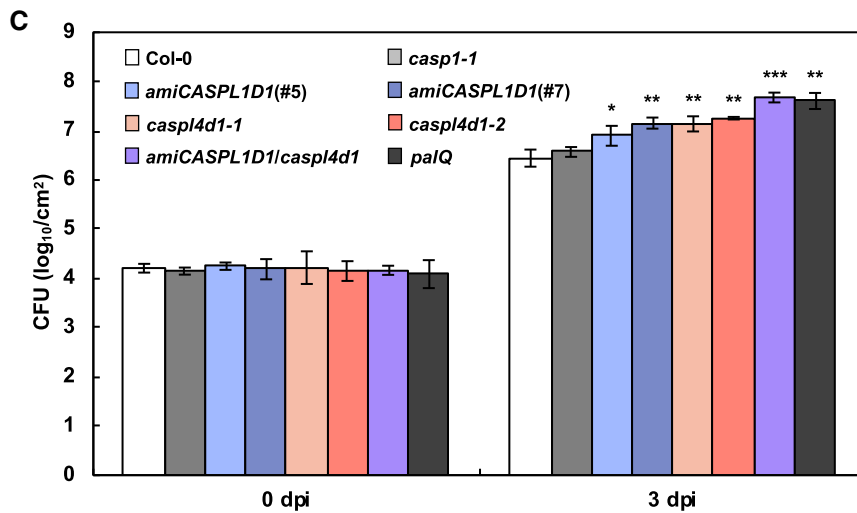

Supplement: EMBJ-38-e101948-s002.pdf [file EMBJ-38-e101948-s002.pdf]
